# Supplementary material for: Impact of an Online Sleep and Circadian Education Program on University Students’ Sleep Knowledge, Attitudes, and Behaviours
Source: MDPI journal article supplement (doi:10.3390/ijerph181910180), 2021-09-28
Supplement: s1 [file s1]

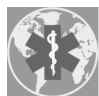

## Supplementary

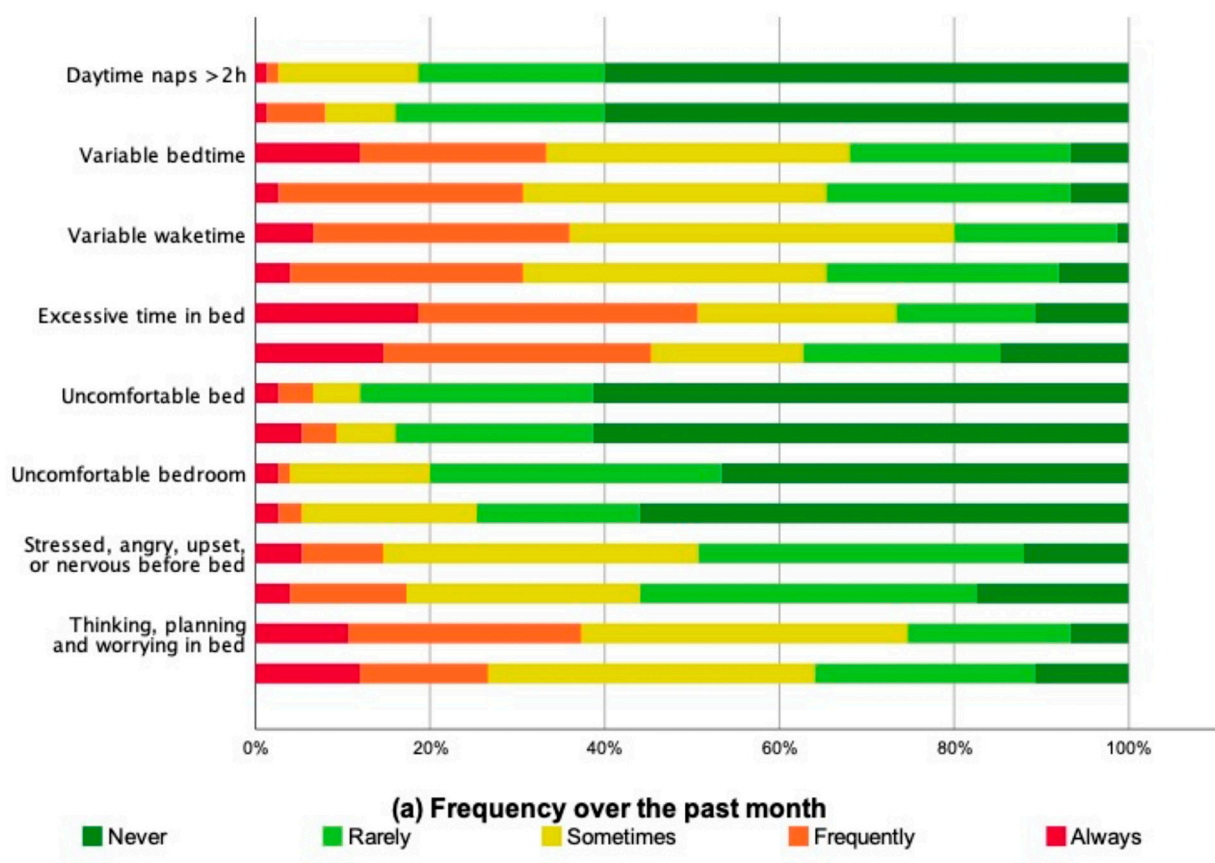

**Figure S1. (a)** Modified Sleep Hygiene Index. Proportion of students endorsing items on the modified Sleep Hygiene Index ( $n = 75$ ) before and 6-months after completion of a sleep and circadian education course. For each pair of bars, the upper bar represents survey responses at baseline and the lower bar represents survey responses at 6-months follow-up.

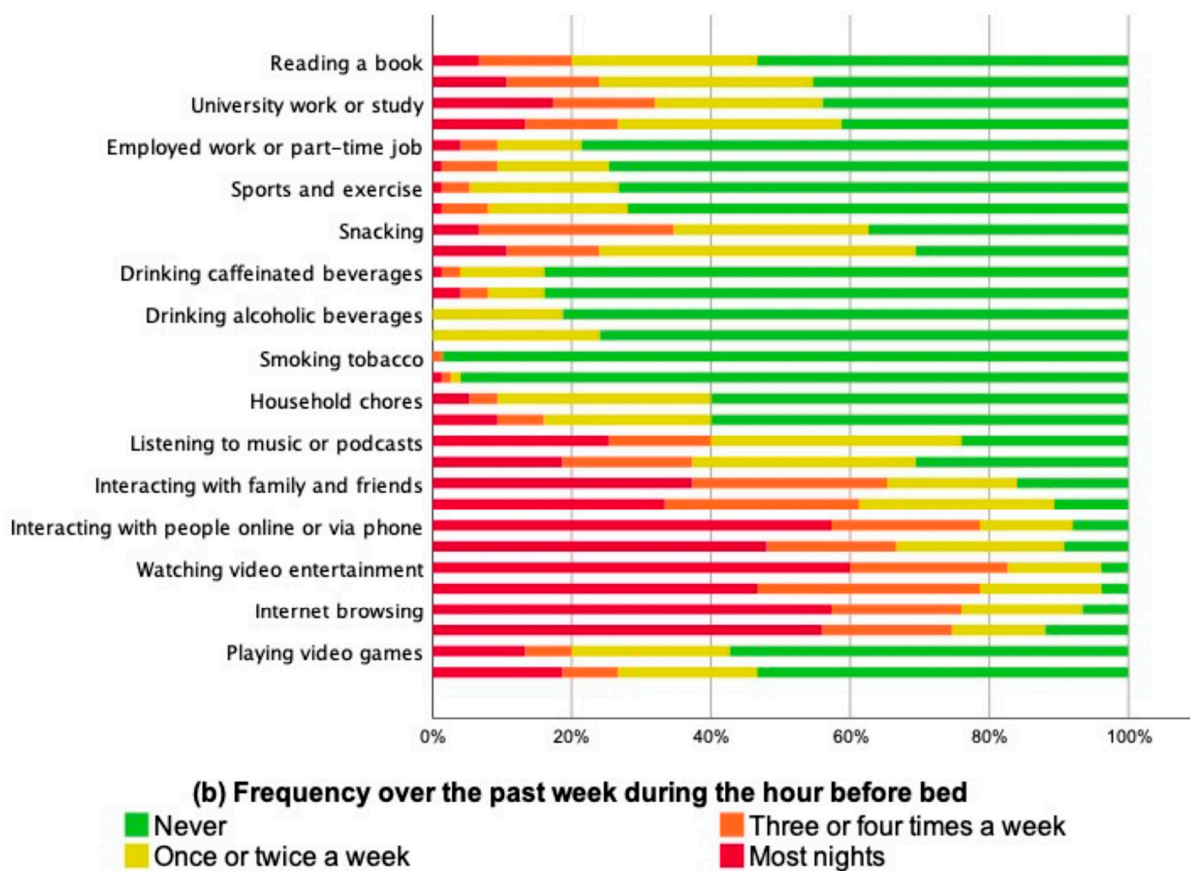

**Figure S1. (b)** Modified Pre-Bed Behaviour Questionnaire. Proportion of students endorsing items on the Pre-Bed Behaviour Questionnaire ( $n = 75$ ) before and 6-months after completion of a sleep and circadian education course. For each pair of bars, the upper bar represents survey responses at baseline and the lower bar represents survey responses at 6-months follow-up.
